# Supplementary material for: Decomposing the Tea Bag Index and finding slower organic matter loss rates at higher elevations and deeper soil horizons in a minerogenic salt marsh
Source: Copernicus journal article supplement (doi:10.5194/bg-22-435-2025), 2025-01-24
Supplement: Supplementary file 1 [file bg-22-435-2025-supplement.pdf]

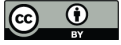

*Supplement of*

**Decomposing the Tea Bag Index and finding slower organic matter loss rates at higher elevations and deeper soil horizons in a minerogenic salt marsh**

Satyatejas G. Reddy et al.

*Correspondence to:* Amanda C. Spivak ([aspivak@uga.edu](mailto:aspivak@uga.edu))

The copyright of individual parts of the supplement might differ from the article licence.

## Supplementary Information

Table S1. Plot elevation (NAVD 88, m) and calculated relative elevation ( $Z^*$ ) (eq. 1) relative to the nearest NOAA tide gauge (Ft. Pulaski, GA 32.035N, 80.903W).

| <b>Plot Number</b> | <b>NAVD88 elevation (m)</b> | <b>Relative Elevation (<math>Z^*</math>)</b> |
|--------------------|-----------------------------|----------------------------------------------|
| 1                  | 0.759                       | 0.739                                        |
| 2                  | 0.817                       | 0.791                                        |
| 3                  | 0.817                       | 0.791                                        |
| 4                  | 0.92                        | 0.882                                        |
| 5                  | 0.957                       | 0.915                                        |
| 6                  | 1.036                       | 0.986                                        |
| 7                  | 1.098                       | 1.041                                        |
| 8                  | 1.127                       | 1.067                                        |
| 9                  | 0.796                       | 0.772                                        |
| 10                 | 0.612                       | 0.608                                        |
| 11                 | 0.623                       | 0.618                                        |
| 12                 | 0.875                       | 0.842                                        |
| 13                 | 0.997                       | 0.951                                        |
| 14                 | 1.051                       | 0.999                                        |
| 15                 | 1.086                       | 1.030                                        |
| 16                 | 1.042                       | 0.991                                        |
| 17                 | 0.796                       | 0.772                                        |
| 19                 | 0.545                       | 0.549                                        |
| 20                 | 0.638                       | 0.631                                        |
| 21                 | 0.62                        | 0.615                                        |
| 22                 | 0.666                       | 0.656                                        |
| 23                 | 0.689                       | 0.677                                        |
| 24                 | 0.657                       | 0.648                                        |

Table S2. Goodness of fit values ( $r^2$ ) for the average rate of decomposition of fresh roots ( $\pm$  SE) from levee and plain salt marsh sites

| Salinity (psu) | Salt Marsh Site | Decomposition Rate ( $k\ d^{-1}$ ) | $r^2$ | p-value |
|----------------|-----------------|------------------------------------|-------|---------|
| 16             | Plain           | 0.0021                             | 0.95  | 0.0001  |
|                | Levee           | 0.0015                             | 0.85  | 0.0001  |
| 27             | Plain           | 0.0019                             | 0.91  | 0.0001  |
|                | Levee           | 0.0016                             | 0.85  | 0.0001  |

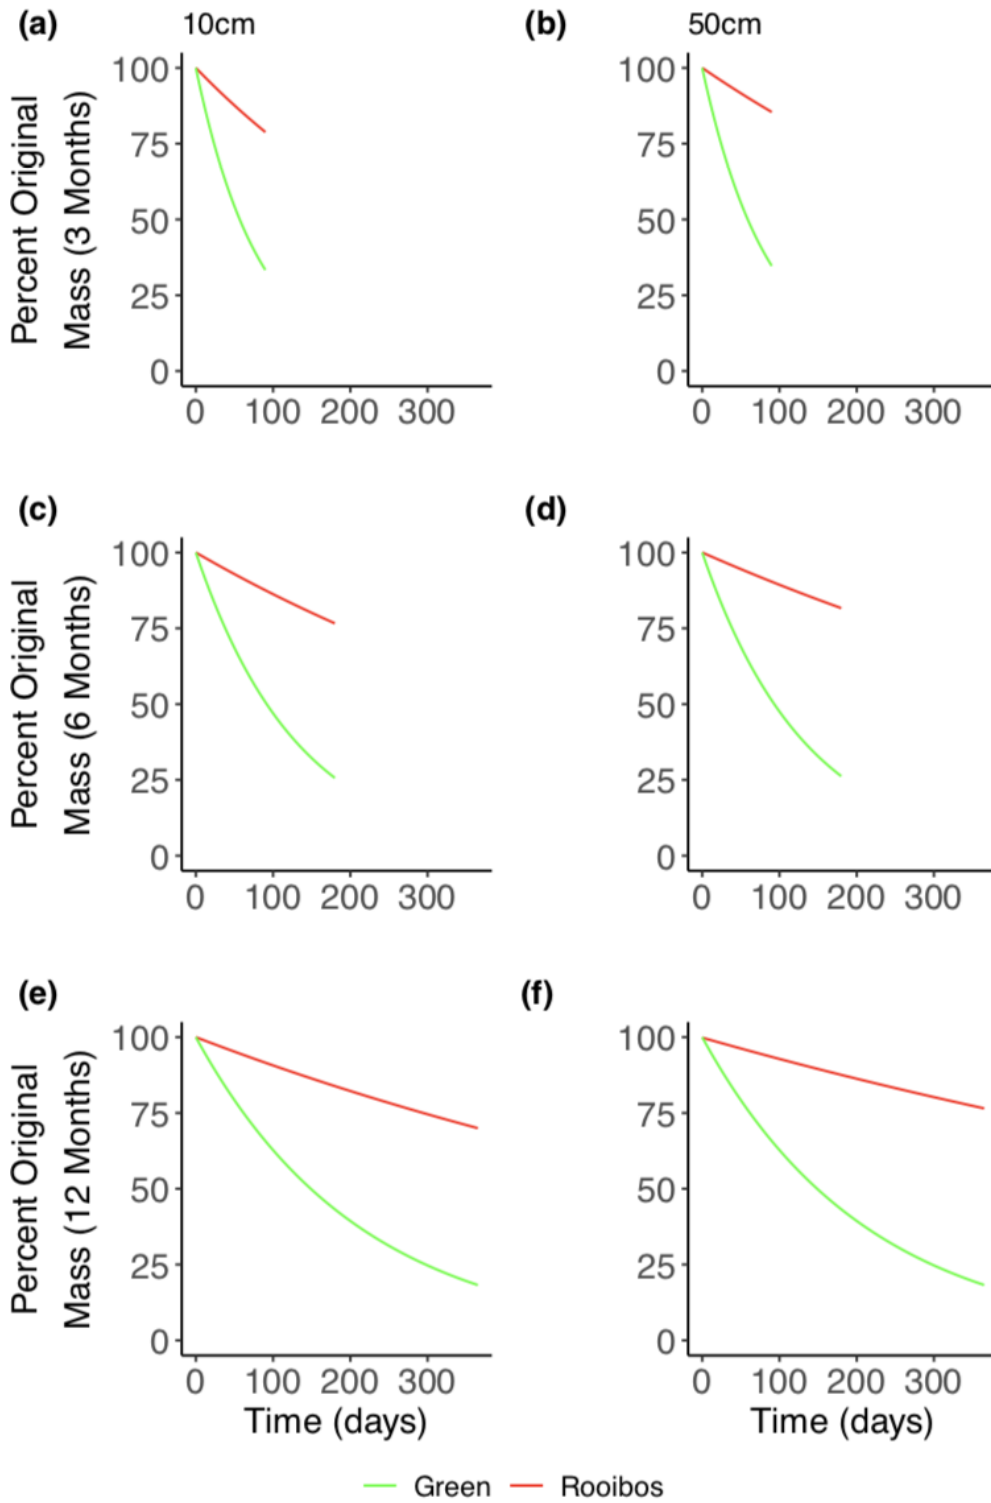

Figure S1. Average empirical decay rates of tea bags at 10 cm (left) and 50 cm (right) changed with tea bag type (rooibos, red; green, green) over time in days during 3- (top), 6- (middle), and 12- months (bottom).

Table S3. Values and studies listed for Fig. 5.

| <u>Decay</u><br><u>(k d<sup>-1</sup>)</u> | <u>Stabilization</u><br><u>(S)</u> | <u>Latitude</u> | <u>Time</u><br><u>(months)</u> | <u>Location</u>                               | <u>Labels</u>            | <u>Study</u>                   |
|-------------------------------------------|------------------------------------|-----------------|--------------------------------|-----------------------------------------------|--------------------------|--------------------------------|
| 0.012                                     | 0.34                               | 31.5            | 3                              | Sapelo Island                                 | GA, USA                  |                                |
| 0.0041                                    | 0.22                               | 31.5            | 6                              | Sapelo Island                                 | GA, USA                  |                                |
| 0.0026                                    | 0.26                               | 31.5            | 12                             | Sapelo Island                                 | GA, USA                  |                                |
| 0.007                                     | 0.236                              | -37.7           | 3                              | Mar Chiquita                                  | B, Argentina             | Meuller et al 2018             |
| 0.0135                                    | -0.033                             | 37.6            | 3                              | Wachapreague                                  | VA, USA                  | Meuller et al 2018             |
| 0.0145                                    | 0.0345                             | 38.2            | 3                              | Rush Ranch                                    | CA, USA                  | Meuller et al 2018             |
| 0.014                                     | 0.0585                             | 38.2            | 3                              | Coon Island                                   | CA, USA                  | Meuller et al 2018             |
| 0.0245                                    | 0.1825                             | 53.4            | 3                              | Noord-Friesland<br>Buitendijks                | FR, Netherlands          | Meuller et al 2018             |
| 0.000                                     | 0.504                              | 48.1            | 3                              | Rimouski                                      | QC, Canada               | Meuller et al 2018             |
| 0.006                                     | 0.4215                             | 53.8            | 3                              | Spiekeroog                                    | NI, Germany              | Meuller et al 2018             |
| 0.011                                     | -0.078                             | 42.7            | 3                              | TIDE project                                  | MA, USA                  | Meuller et al 2018             |
| 0.012                                     | -0.035                             | 42.7            | 3                              | Laws Point                                    | MA, USA                  | Meuller et al 2018             |
| 0.0165                                    | -0.085                             | 38.7            | 3                              | Patuxent River                                | MD, USA                  | Meuller et al 2018             |
| 0.008                                     | 0.219                              | 40.8            | 3                              | Alfacs                                        | TGN, Catalonia,<br>Spain | Meuller et al 2018             |
| 0.008                                     | -0.003                             | 53.5            | 3                              | Schiermonnikoog<br>Venice Lagoon<br>(Meuller) | FR, Netherlands          | Meuller et al 2018             |
| 0.005                                     | 0.258                              | 45.5            | 3                              | China Camp                                    | VEN, Italy               | Meuller et al 2018             |
| 0.011                                     | 0.098                              | 38.1            | 3                              | China Camp                                    | CA, USA                  | Meuller et al 2018             |
| 0.0155                                    | -0.0675                            | 53.4            | 3                              | Ameland                                       | FR, Netherlands          | Meuller et al 2018             |
| 0.0195                                    | 0.0535                             | 54.6            | 3                              | Sönke-Nissen-Koog                             | SH, Germany              | Meuller et al 2018             |
| 0.0275                                    | 0.1505                             | 54              | 3                              | Dieksanderkoog                                | SH, Germany              | Meuller et al 2018             |
| -0.001                                    | 0.347                              | 40.8            | 3                              | Garxal                                        | TGN, Catalonia,<br>Spain | Meuller et al 2018             |
| 0.011                                     | 0.1655                             | 45.1            | 3                              | Dipper Harbor                                 | NB, Canada               | Meuller et al 2018             |
| 0.017                                     | 0.161                              | 54.6            | 3                              | Mechelinskie Laki                             | PM, Poland               | Meuller et al 2018             |
| 0.0175                                    | -0.1055                            | 38.9            | 3                              | Rhode River                                   | CA, USA                  | Meuller et al 2018             |
| 0.004                                     | 0.242                              | 43.8            | 3                              | Long Marsh, north of<br>inlet                 | ME, USA                  | Meuller et al 2018             |
| 0.007                                     | 0.189                              | 43.8            | 3                              | Long Marsh, south of<br>inlet                 | ME, USA                  | Meuller et al 2018             |
| 0.013                                     | -0.028                             | 31.5            | 3                              | Dongtan                                       | ZJ, China                | Meuller et al 2018             |
| 0.031                                     | 0.337                              | 40.8            | 3                              | Vilacoto                                      | TGN, Catalonia,<br>Spain | Meuller et al 2018             |
| 0.007                                     | 0.195                              | 43.8            | 3                              | Long Marsh, south of<br>Narrows               | ME, USA                  | Meuller et al 2018             |
| 0.008                                     | 0.40                               | 54.6            | 12                             | Hamburger Hallig                              | SH, Germany              | Tang et al 2023                |
| 0.012                                     | 0.015                              | 45.3            | 3                              | Venice Lagoon<br>(Puppini)                    | VEN, Italy               | Puppini et al 2023             |
| 0.011                                     | 0.09                               | 34.2            | 3                              | Wrightsville Beach                            | NC, USA                  | Yousefi Lalimi et<br>al., 2018 |
| 0.008                                     | 0.18                               | 56.0            | 3                              | Belhaven Bay                                  | ELN, Scotland            | Marley et al. 2019             |
| 0.003                                     | 0.15                               | 56.0            | 12                             | Belhaven Bay                                  | ELN, Scotland            | Marley et al. 2019             |
| 0.011                                     | 0.18                               | 25.7            | 3                              | Northeast Qatar                               | KH, Qatar                | Alsafran et al.<br>2017        |
| 0.0086                                    | 0.16                               | 41.6            | 3                              | Cape Cod                                      | MA, USA                  | Sanderman and<br>Eagle, unpb   |
